# Supplementary material for: Boron From Net Charge Acceptor to Donor and Its Effect on Hydrogen Uptake by Novel Mg-B-electrochemically Synthesized Reduced Graphene Oxide
Source: Research Square preprint supplement (doi:10.21203/rs.3.rs-109421/v1), 2020-11-24
Supplement: Supplementary file 1 [file 381e9ecea0f622e92bd4b570.pdf]

## **Supplementary Information**

### **Boron from net charge acceptor to donor and its effect on hydrogen uptake by novel Mg-B-electrochemically synthesized reduced graphene oxide**

Marla V V Satya Aditya, Srikanta Panda, and Sankara Sarma V Tatiparti\*

Department of Energy Science & Engineering, Indian Institute of Technology Bombay,  
Mumbai 400076, India

**\*Corresponding author E-mail: [sankara@iitb.ac.in](mailto:sankara@iitb.ac.in)**

## X-ray diffraction (XRD)

XRD patterns of magnesium (Mg)-boron (B)-electrochemically synthesized reduced graphene oxide (erGO) nanocomposites are shown in Fig. S1. The peaks at  $\sim 32.2^\circ$ ,  $\sim 34.4^\circ$ ,  $\sim 36.6^\circ$ ,  $\sim 47.8^\circ$ ,  $\sim 57.4^\circ$ ,  $\sim 63.1^\circ$ ,  $\sim 67.3^\circ$ ,  $\sim 68.6^\circ$ ,  $\sim 70.2^\circ$ ,  $\sim 72.5^\circ$ ,  $\sim 77.8^\circ$  and  $\sim 81.5^\circ$  correspond to hexagonal close packed structure (hcp) of Mg phase [ICSD code: 76748]. The minor peak at  $\sim 42.8^\circ$  corresponds to MgO [ICSD code: 104845]. Peaks corresponding to erGO are not seen.

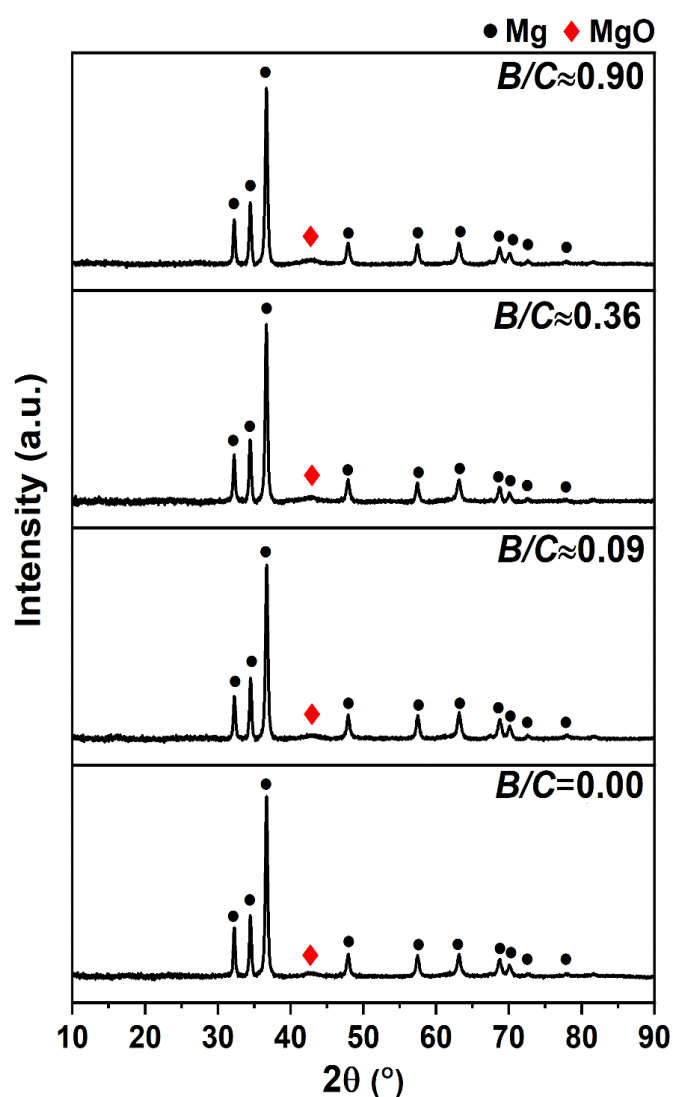

**Figure S1.** XRD patterns for ball milled Mg-B-erGO nanocomposites at various  $B/C$  ratios.

XRD pattern of erGO is shown in Fig. S2. Peaks corresponding to  $\sim 26.56^\circ$ ,  $\sim 42.39^\circ$ ,  $\sim 44.56^\circ$ ,  $\sim 54.48^\circ$ , and  $\sim 77.61^\circ$  correspond to carbon [ICSD code: 31170].

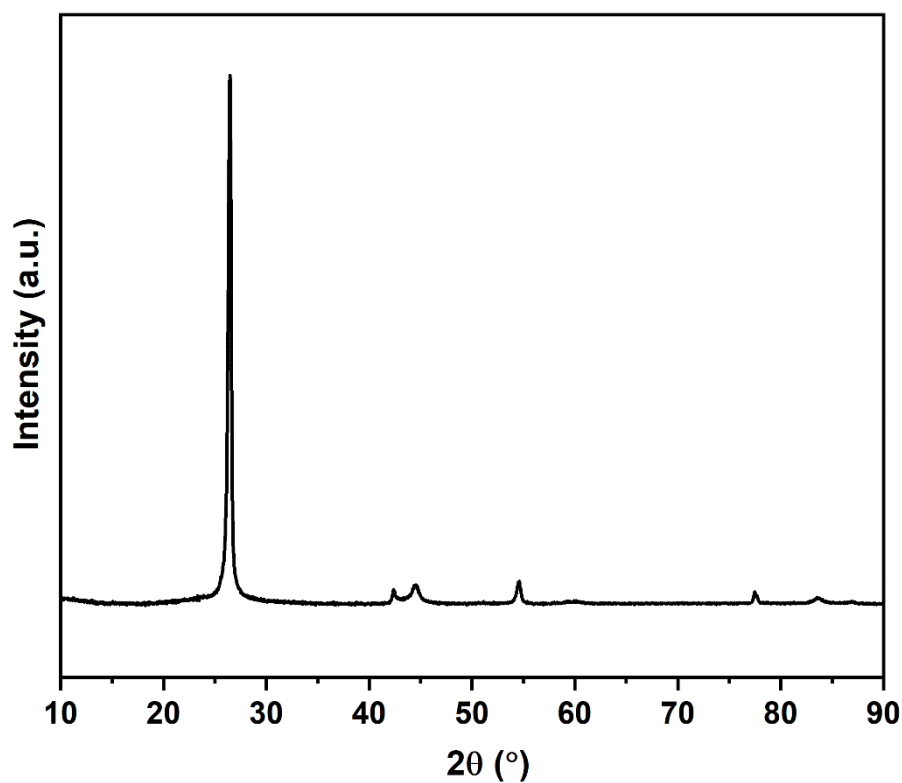

**Figure S2.** XRD pattern for electrochemical reduced graphene oxide (erGO).

### Phase percentages

The phase percentages of Mg and MgO were estimated from Rietveld refinement using FullProf Suite (Version: 7.20)<sup>1</sup> and shown in Table S1.

**Table S1.** Phase percentages of Mg and MgO in the ball milled Mg-B-erGO nanocomposites for various *B/C* ratios.

| <i>B/C</i> ratio | Mg (%) | MgO (%) | Convergence ( $\chi^2$ ) |
|------------------|--------|---------|--------------------------|
| 0.00             | 89.21  | 10.79   | 2.42                     |
| 0.09             | 79.86  | 20.14   | 3.11                     |
| 0.36             | 84.91  | 15.09   | 2.58                     |
| 0.90             | 82.80  | 17.20   | 3.73                     |

## Electron density maps

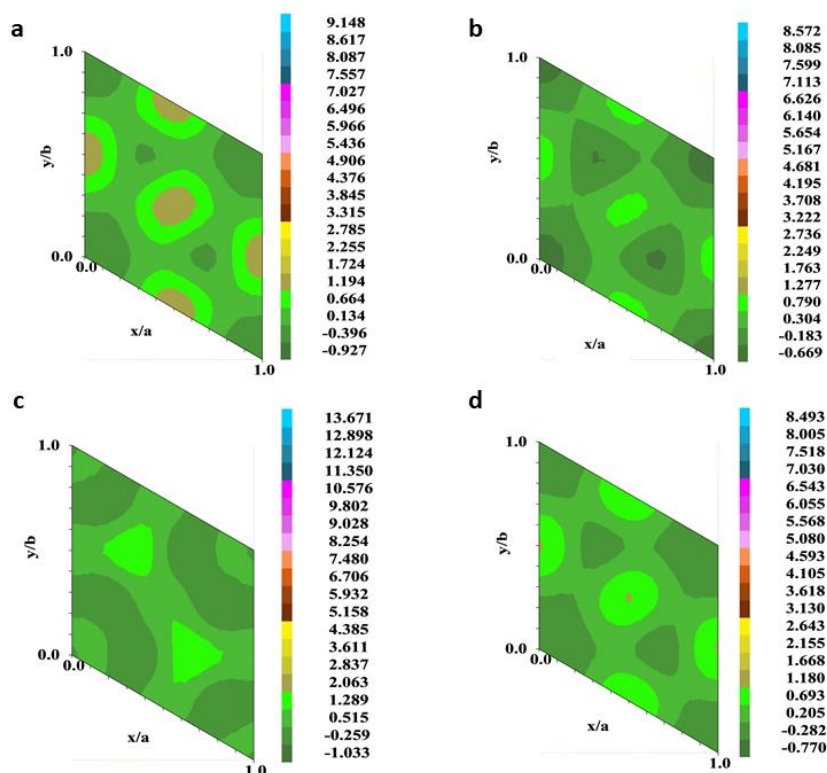

**Figure S3.** Electron density maps corresponding to (0001) plane of Mg unit cell for ball milled Mg-B-erGO nanocomposites at (a)  $B/C=0$ , (b)  $B/C \approx 0.09$ , (c)  $B/C \approx 0.36$  and (d)  $B/C \approx 0.90$ .

## X-ray photoelectron spectroscopy (XPS)

The C-1s core XPS spectra obtained from erGO are shown in Fig. S4. Peaks observed at binding energies  $\sim 284.44 - 284.55$  eV,  $\sim 285.35$  eV and  $288.8$  eV correspond to  $sp^2$  hybridized C-C, C-OH (alkoxy), C-O-C (epoxy), and C=O (carbonyl) functional groups, respectively<sup>2-4</sup>. The oxygen functional groups are attached to C while erGO synthesis.

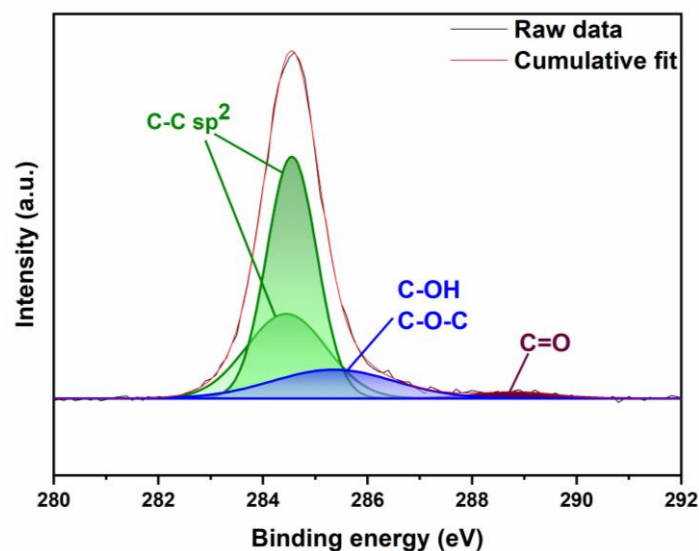

**Figure S4.** XPS C-1s core-level spectra obtained from erGO.

The B-1s core XPS spectra are shown in Fig. S5. The peaks corresponding to boron substituted carbon, B<sub>4</sub>C, C<sub>2</sub>-BO, C-BO<sub>2</sub> phases at ~189.1 eV, ~187.7 eV, ~191.4 eV, ~191.8 eV, respectively are absent<sup>5</sup>.

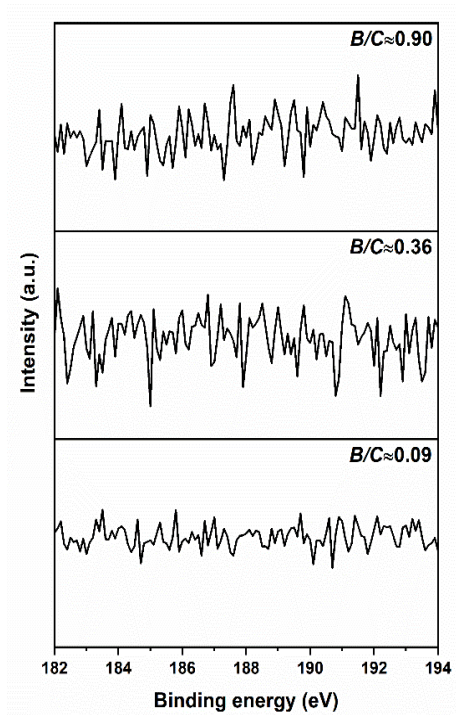

**Figure S5.** XPS B-1s core spectra for ball milled Mg-B-erGO nanocomposites at various  $B/C$  ratios.

## References

1. Rodriguez-Carvajal, J. FULLPROF, a program for Rietveld refinement and pattern matching analyses. *Satellite Meeting on Powder Diffraction of the XVth Congress of the International Union of Crystallography* **127**, (1990).
2. Li, S. *et al.* Plasma-induced highly efficient synthesis of boron doped reduced graphene oxide for supercapacitors. *Chem. Commun.* **52**, 10988–10991 (2016).
3. Rabchinskii, M. K. *et al.* From graphene oxide towards aminated graphene: facile synthesis, its structure and electronic properties. *Sci. Rep.* **10**, 1–12 (2020).
4. Kovtun, A. *et al.* Accurate chemical analysis of oxygenated graphene-based materials using X-ray photoelectron spectroscopy. *Carbon* **143**, 268–275 (2019).
5. Wang, G. *et al.* Interlayer coupling behaviors of boron doped multilayer graphene. *J. Phys. Chem. C* **121**, 26034–26043 (2017).
